# Supplementary material for: Pharmacological blockade of aquaporin-1 water channel by AqB013 restricts migration and invasiveness of colon cancer cells and prevents endothelial tube formation in vitro
Source: PubMed Central journal article supplement (PMC4765103; doi:10.1186/s13046-016-0310-6), 2016-02-24

## qRT-PCR AQP1 and AQP5

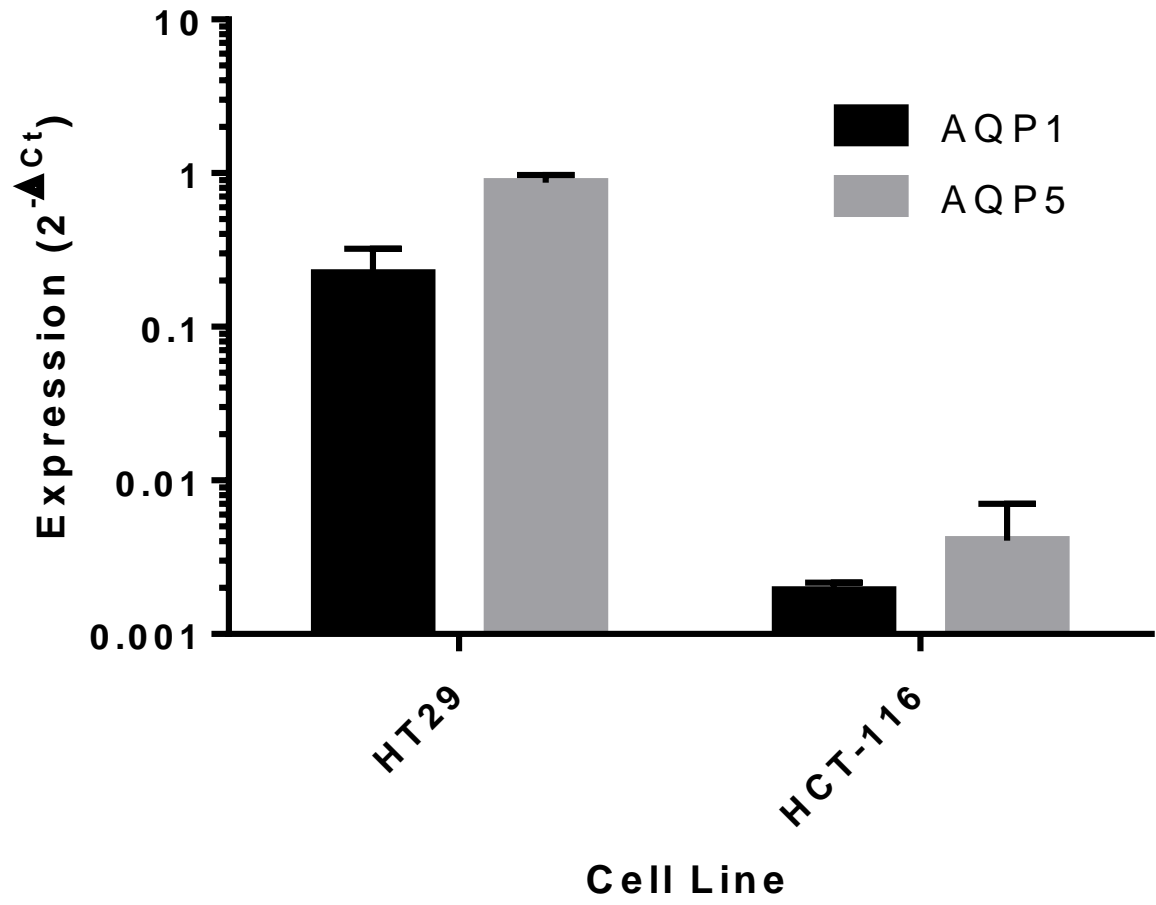

Supplement: 13046_2016_310_MOESM1_ESM.pdf [file 13046_2016_310_MOESM1_ESM.pdf]
